# Supplementary material for: Burden of out-of-pocket payments among patients with cardiovascular disease in public and private hospitals in Ibadan, South West, Nigeria: a cross-sectional study
Source: PubMed Central journal article supplement — BMJ Open. 2021 Jun 8;11(6):e044044. doi: 10.1136/bmjopen-2020-044044 (PMC8190042; doi:10.1136/bmjopen-2020-044044), 2021-06-08
Supplement: bmjopen-2020-044044supp001.pdf [file bmjopen-2020-044044supp001.pdf]

*Sample size determination and sampling procedure*

To estimate the sample size for a continuous outcome variable such as costs and assuming that mean (average) cost  $\mu$  and standard deviation  $\sigma$  are normally distributed. The width of the precision of a given sample size according to Johnston et. al. [1] can be expressed as:

$$\left(W = 1.96 \times \frac{\sigma}{\sqrt{n}}\right)^2 \quad (1)$$

However, it is difficult to identify studies with appropriate value for  $\sigma$ , therefore in the absence of this, Johnston et. al. proposed the following formula:

$$\left(\frac{1.96 \times C_v}{V}\right)^2 \quad (2)$$

Where  $C_v$  denote the coefficient of variation (i.e. the ratio of the standard deviation and the mean cost),  $V$  represent the desired level of precision which is 95% confidence interval (CI). The  $C_v$  for a 95% CI is 0.50. Thus, the minimum sample size was determined as follows:

$$n = \left(\frac{1.96 \times 0.50}{0.05}\right)^2 = 384 \quad (3)$$

Adjusting the sample size for 10% non-response rate:

$$n_f = \frac{n}{1-NR} \quad (4)$$

Where  $n_f$  denotes non-response and  $NR$ , non-response rate

$$n_f = \frac{384}{1-0.1} = 427 \quad (5)$$

**Reference**

1. Johnston KM, Lakzadeh P, Donato BM, Szabo SM. Methods of sample size calculation in descriptive retrospective burden of illness studies. BMC medical research methodology. 2019 Dec;19(1):1-7.
